# Supplementary material
Source: Springer Nature journal article supplement (https://www.springermedizin.de/resource/supplementary/12960_2009_230_MOESM3_ESM.pdf/9570692)
Supplement: MOESM3 [file 9570692]

### Malawi (2006 - 2008)

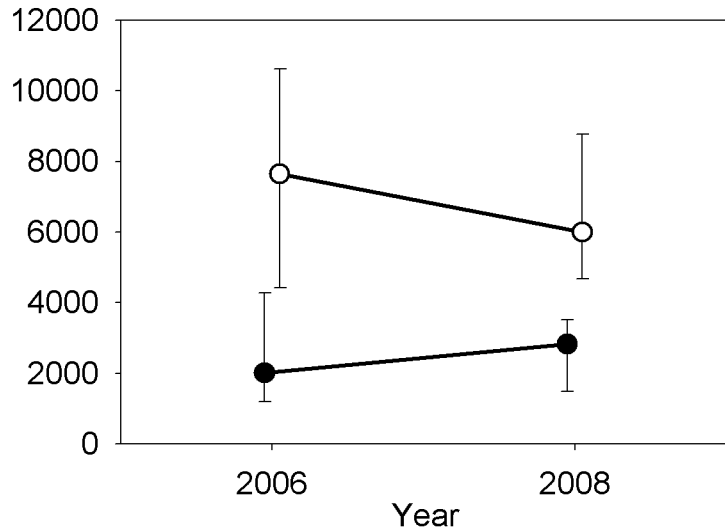

### Zambia (2004 - 2007)

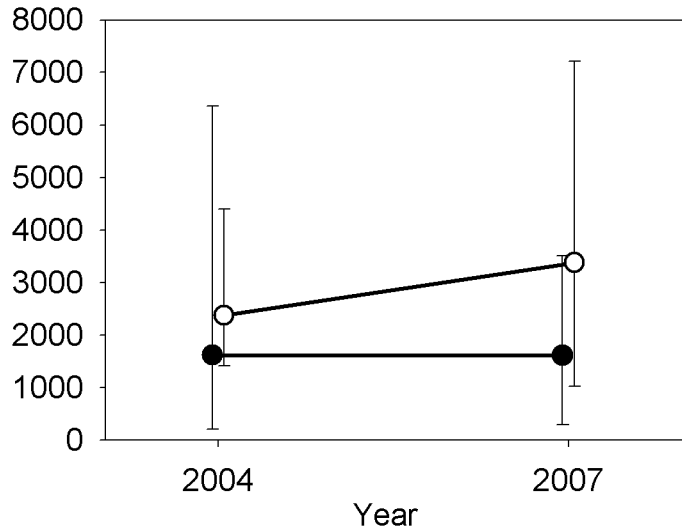

—●— ART provider (Facilities: Malawi 18, Zambia 14)  
—○— Non-ART provider (Facilities: Malawi 29, Zambia 7)
